# Supplementary material for: Is Osteopontin a Good Marker for Bone Metastasis in Canine Mammary Gland Tumor and Prostate Cancer?
Source: MDPI journal article supplement (doi:10.3390/ani13203211), 2023-10-14
Supplement: s1 [file s1]

**Table S2.** Regression logistic multiple analysis with each variable individually as dependent variable and the others as independent variables.

| Weight as dependent variable                |                          |         |         |                 |
|---------------------------------------------|--------------------------|---------|---------|-----------------|
| Significant different than zero?            | Variable                 | t       | P value | P value summary |
| $\beta_0$                                   | Intercept                | 1,388   | 0,1797  | ns              |
| $\beta_1$                                   | B: Age                   | 0,172   | 0,8651  | ns              |
| $\beta_2$                                   | C: Histological Subtype  | 0,04181 | 0,967   | ns              |
| $\beta_3$                                   | E: Disease free-interval | 1,352   | 0,1908  | ns              |
| $\beta_4$                                   | F: Overall survival      | 0,9122  | 0,372   | ns              |
| $\beta_5$                                   | G: OPN expression        | 0,4817  | 0,635   | ns              |
| $\beta_6$                                   | H: Metastasis            | 1,093   | 0,2868  | ns              |
| Age as dependent variable                   |                          |         |         |                 |
| Significant different than zero?            | Variable                 | t       | P value | P value summary |
| $\beta_0$                                   | Intercept                | 0,3664  | 0,7177  | ns              |
| $\beta_1$                                   | A: Weight                | 0,172   | 0,8651  | ns              |
| $\beta_2$                                   | C: Histological Subtype  | 2,774   | 0,0114  | *               |
| $\beta_3$                                   | E: Disease free-interval | 0,9183  | 0,3689  | ns              |
| $\beta_4$                                   | F: Overall survival      | 0,1085  | 0,9146  | ns              |
| $\beta_5$                                   | G: OPN expression        | 0,9637  | 0,3462  | ns              |
| $\beta_6$                                   | H: Metastasis            | 0,3199  | 0,7522  | ns              |
| Histological subtypes as dependent variable |                          |         |         |                 |
| Significant different than zero?            | Variable                 | t       | P value | P value summary |
| $\beta_0$                                   | Intercept                | 2,168   | 0,0418  | *               |
| $\beta_1$                                   | A: Weight                | 0,04181 | 0,967   | ns              |
| $\beta_2$                                   | B: Age                   | 2,774   | 0,0114  | *               |
| $\beta_3$                                   | E: Disease free-interval | 0,6641  | 0,5138  | ns              |
| $\beta_4$                                   | F: Overall survival      | 2,372   | 0,0273  | *               |
| $\beta_5$                                   | G: OPN expression        | 0,484   | 0,6334  | ns              |
| $\beta_6$                                   | H: Metastasis            | 0,3596  | 0,7227  | ns              |
| Disease-free interval as dependent variable |                          |         |         |                 |
| Significant different than zero?            | Variable                 | t       | P value | P value summary |
| $\beta_0$                                   | Intercept                | 0,3841  | 0,7048  | ns              |
| $\beta_1$                                   | A: Weight                | 1,352   | 0,1908  | ns              |
| $\beta_2$                                   | B: Age                   | 0,9183  | 0,3689  | ns              |
| $\beta_3$                                   | C: Histological Subtype  | 0,6641  | 0,5138  | ns              |
| $\beta_4$                                   | F: Overall survival      | 3,234   | 0,004   | **              |
| $\beta_5$                                   | G: OPN expression        | 0,7856  | 0,4409  | ns              |
| $\beta_6$                                   | H: Metastasis            | 0,3886  | 0,7015  | ns              |

### Overall survival as dependent variable

| Significant different than zero? | Variable                 | t      | P value | P value summary |
|----------------------------------|--------------------------|--------|---------|-----------------|
| $\beta_0$                        | Intercept                | 2,129  | 0,0452  | *               |
| $\beta_1$                        | A: Weight                | 0,9122 | 0,372   | ns              |
| $\beta_2$                        | B: Age                   | 0,1085 | 0,9146  | ns              |
| $\beta_3$                        | C: Histological Subtype  | 2,372  | 0,0273  | *               |
| $\beta_4$                        | E: Disease free-interval | 3,234  | 0,004   | **              |
| $\beta_5$                        | G: OPN expression        | 0,9711 | 0,3425  | ns              |
| $\beta_6$                        | H: Metastasis            | 0,6078 | 0,5499  | ns              |

### Osteopontin as dependent variable

| Significant different than zero? | Variable                 | t      | P value | P value summary |
|----------------------------------|--------------------------|--------|---------|-----------------|
| $\beta_0$                        | Intercept                | 7,002  | <0,0001 | ****            |
| $\beta_1$                        | A: Weight                | 0,4817 | 0,635   | ns              |
| $\beta_2$                        | B: Age                   | 0,9637 | 0,3462  | ns              |
| $\beta_3$                        | C: Histological Subtype  | 0,484  | 0,6334  | ns              |
| $\beta_4$                        | E: Disease free-interval | 0,7856 | 0,4409  | ns              |
| $\beta_5$                        | F: Overall survival      | 0,9711 | 0,3425  | ns              |
| $\beta_6$                        | H: Metastasis            | 12,37  | <0,0001 | ****            |

### Metastasis as dependent variable

| Significant different than zero? | Variable                 | t      | P value | P value summary |
|----------------------------------|--------------------------|--------|---------|-----------------|
| $\beta_0$                        | Intercept                | 8,559  | <0,0001 | ****            |
| $\beta_1$                        | A: Weight                | 1,093  | 0,2868  | ns              |
| $\beta_2$                        | B: Age                   | 0,3199 | 0,7522  | ns              |
| $\beta_3$                        | C: Histological Subtype  | 0,3596 | 0,7227  | ns              |
| $\beta_4$                        | E: Disease free-interval | 0,3886 | 0,7015  | ns              |
| $\beta_5$                        | F: Overall survival      | 0,6078 | 0,5499  | ns              |
| $\beta_6$                        | G: OPN expression        | 12,37  | <0,0001 | ****            |

ns: not statistically different; \*\*\*: statistical difference.
